# Supplementary material
Source: PubMed Central journal article supplement (PMC3070580)

**A**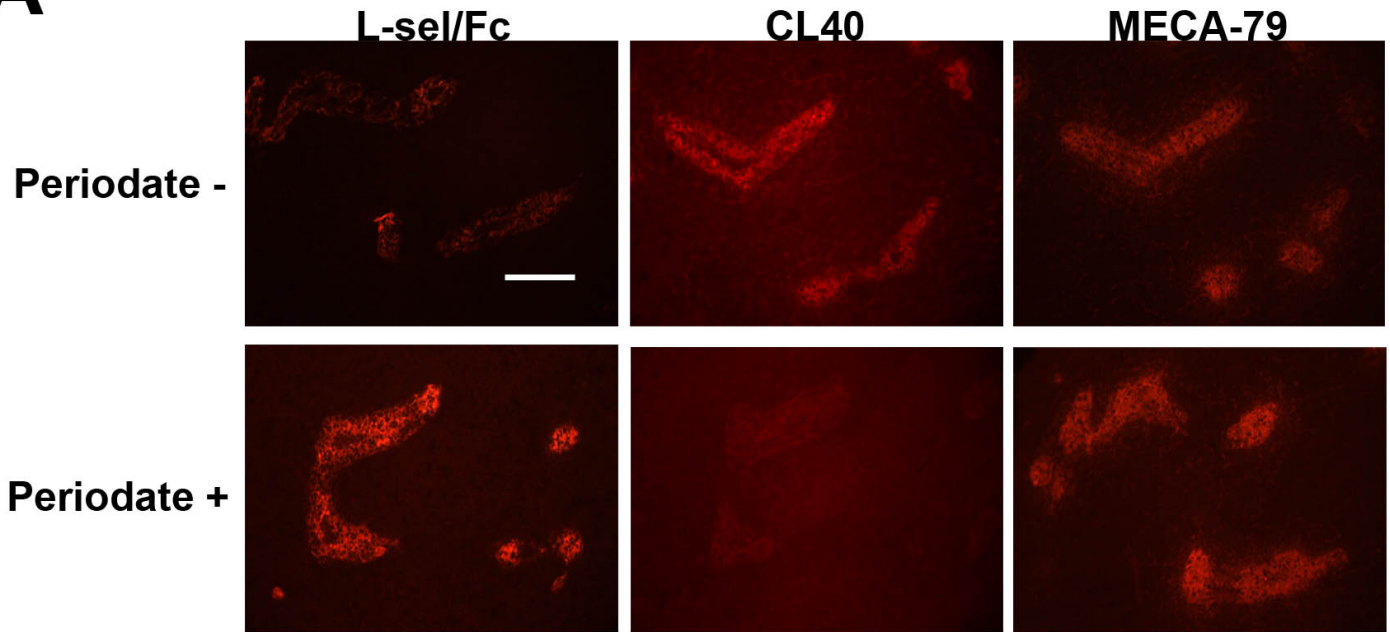**B**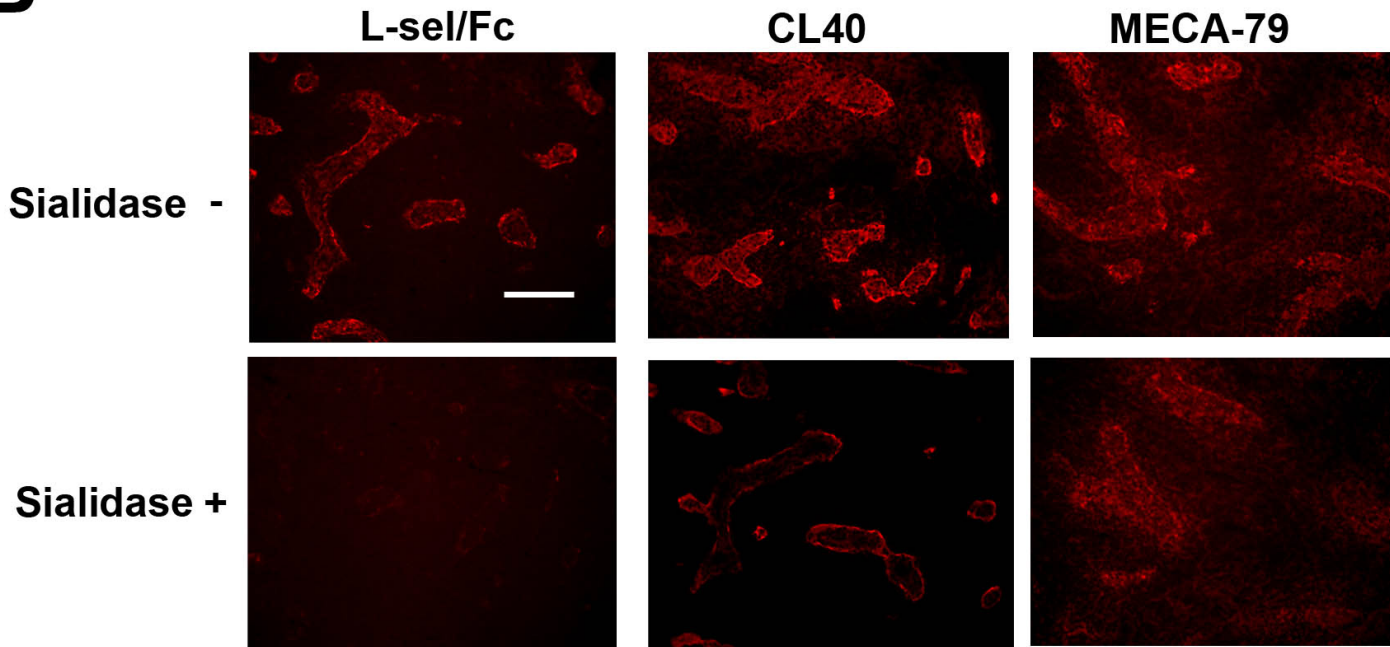

Sup Fig. 1

Supplement: mmc1.pdf [file mmc1.pdf]

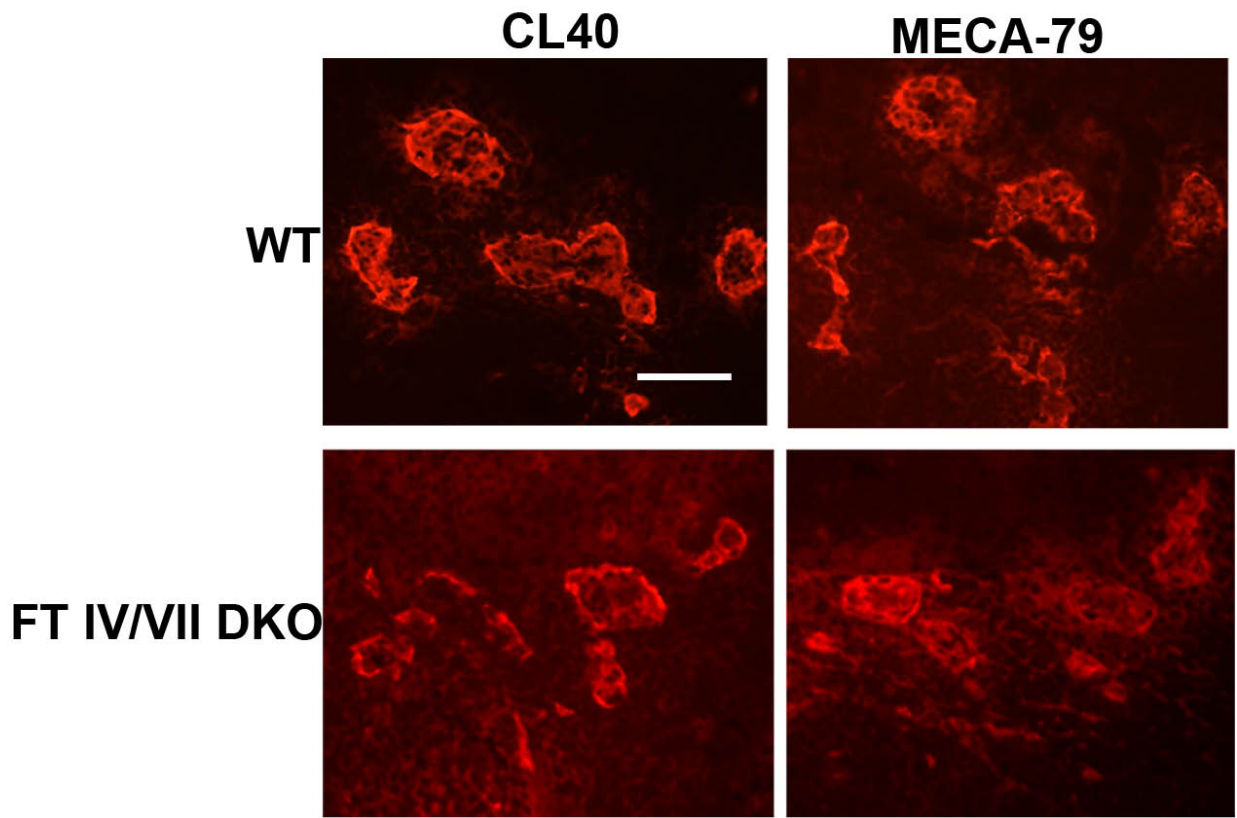

Sup Fig. 2

Supplement: mmc2.pdf [file mmc2.pdf]

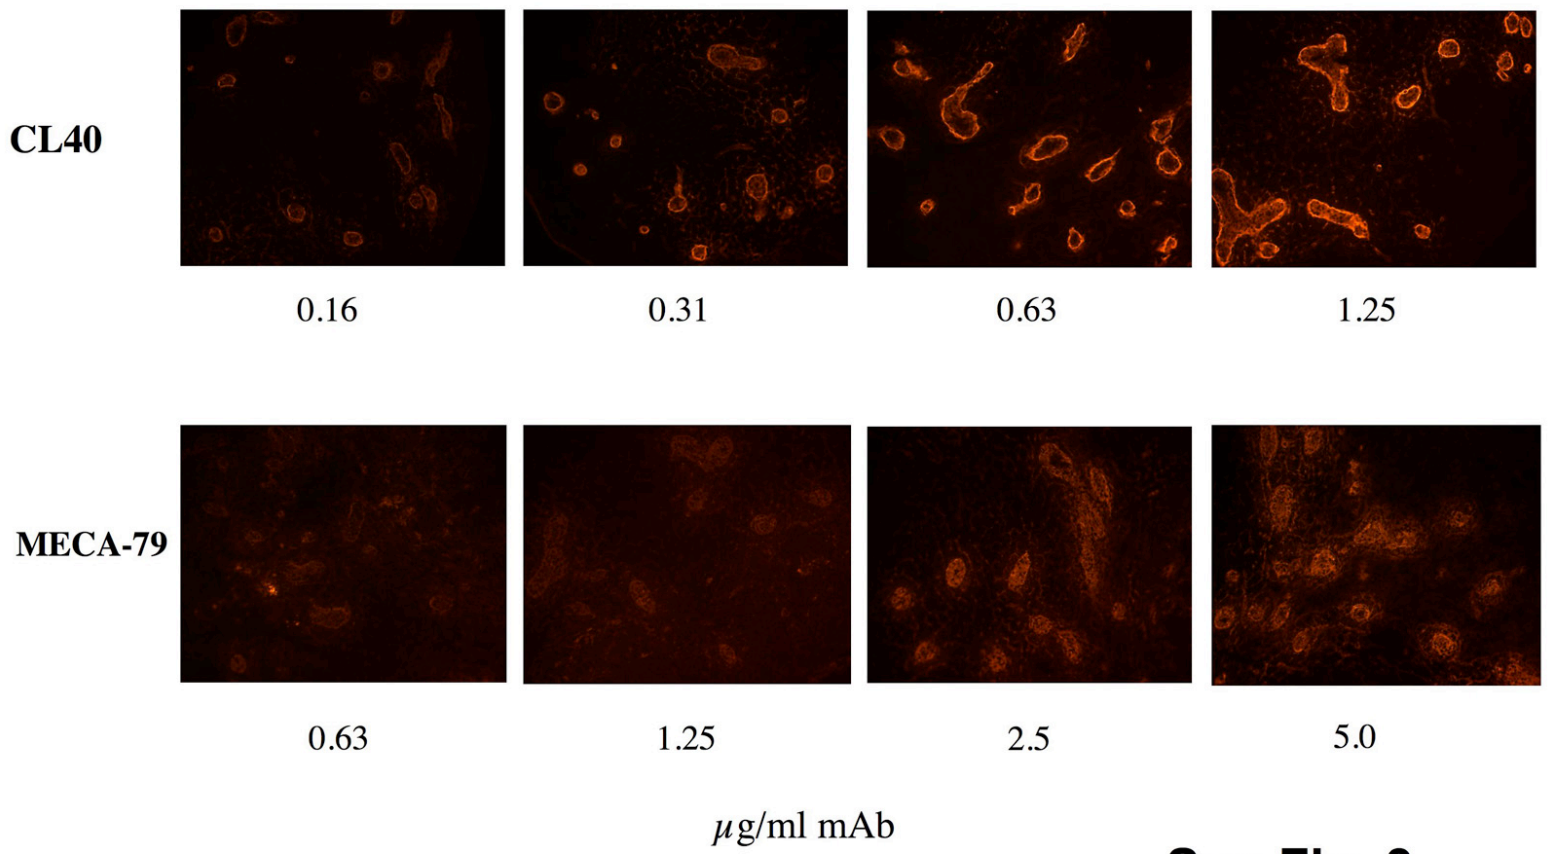

**Sup Fig. 3**

Supplement: mmc3.pdf [file mmc3.pdf]

**A**

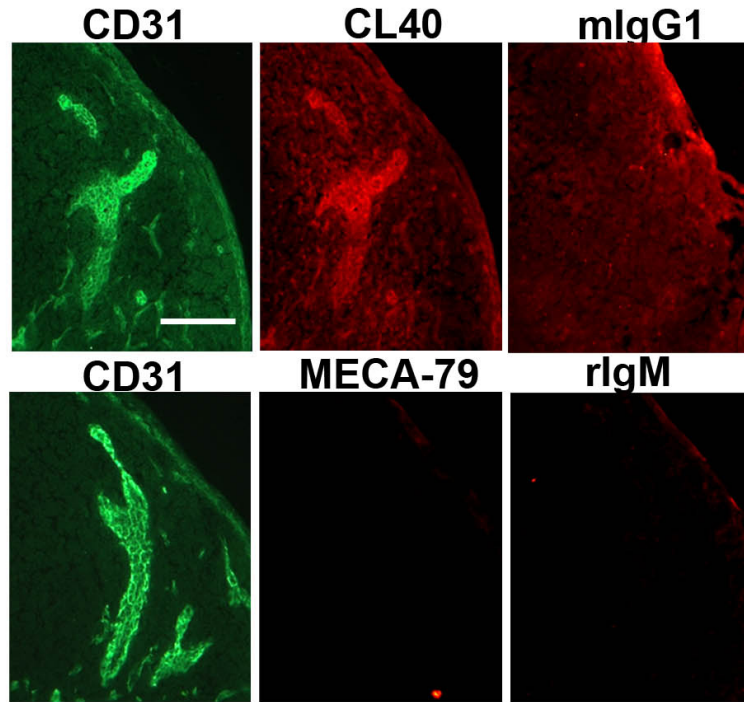

**B**

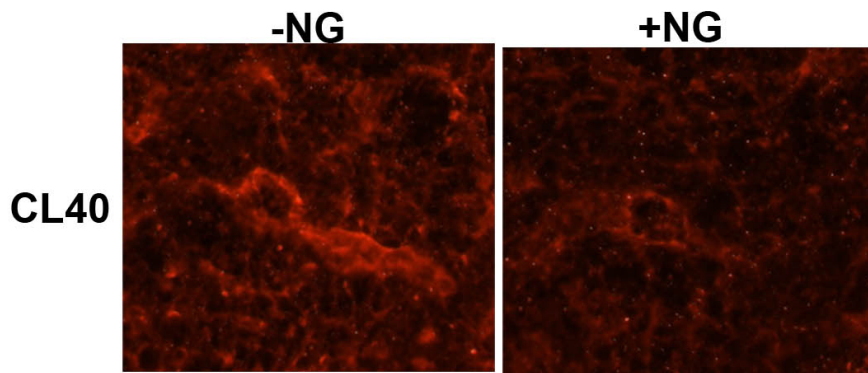

Sup Fig. 4

Supplement: mmc4.pdf [file mmc4.pdf]

**A**

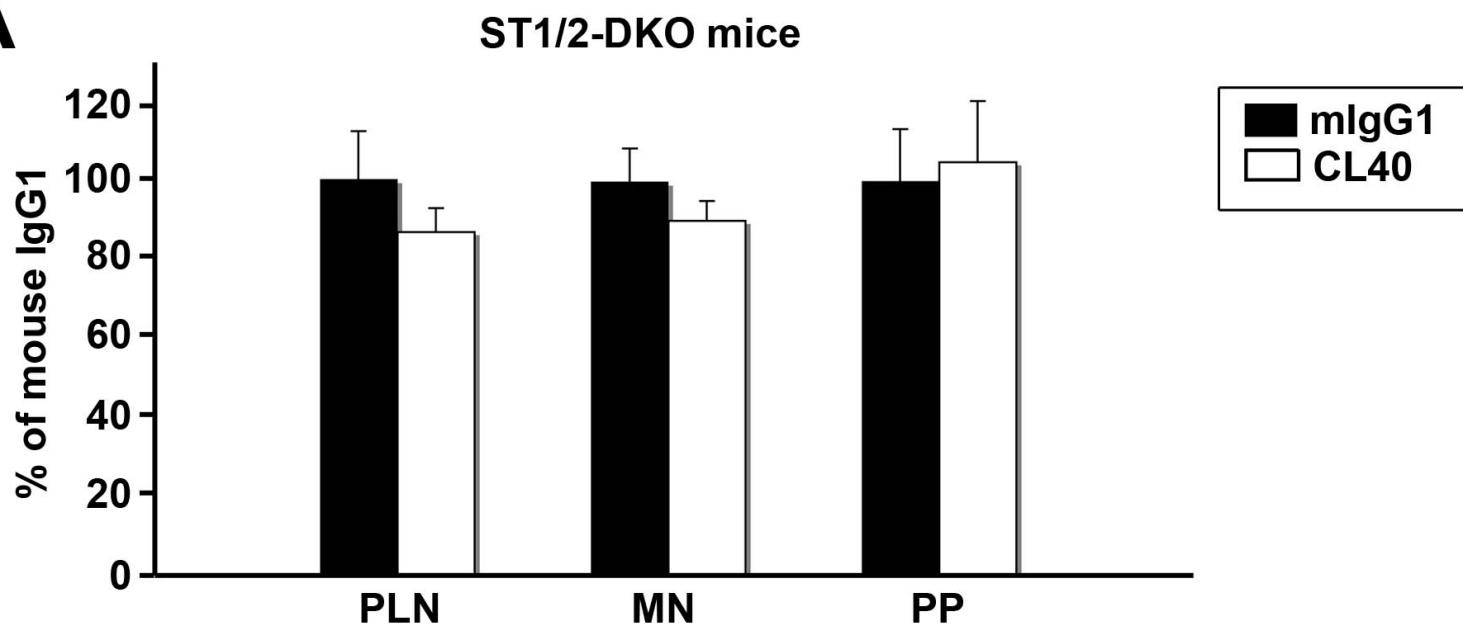

**Sup Fig. 5**

Supplement: mmc5.pdf [file mmc5.pdf]
